# Supplementary material for: Dahongpao mother tree affects soil microbial community and nutrient cycling by increasing rhizosphere soil characteristic metabolite content
Source: Front Plant Sci. 2025 May 26;16:1508622. doi: 10.3389/fpls.2025.1508622 (PMC12146383; doi:10.3389/fpls.2025.1508622)
Supplement: Supplementary Table 1 — Metabolites in rhizosphere soil of MD and PD. [file Table1.xlsx]

## Sheet: Table S1
Index	Molecular weight (Da)	Formula	RI	NIST20 RI	Compounds	Class I	CAS	Metabolite content of Cutting Dahongpao rhizosphere soil			Metabolite content of Dahongpao mother tree rhizosphere soil
								Repeat 1 (PD-1)	Repeat 2 (PD-2)	Repeat 3 (PD-3)	Repeat 1 (MD-1)	Repeat 2 (MD-2)	Repeat 3 (MD-3)
TMS_IS_08	157.11	13C5H12O5	1700.37	1700	Ribitol-13C5	Carbohydrate	CMS-N0382	289970	263412	324902	340461	385005	353008
S_TMSMW0843	230.15	C12H22O4	1453	1774	(1R,2S,5R)-2-isopropyl-5-methylcyclohexyl 2,2-dihydroxyacetate	Ester	111969-64-3	324038	326729	309210	374590	410571	390662
S_TMSMW0447	120.04	C4H8O4	1243.48	1451	(2R,3S)-2,3,4-trihydroxybutanal	Aldehyde	95-44-3	22510	28199	27327	45818	44530	39139
S_TMSMW0489	386.355	C27H46O	3150.99	2654	(3.alpha.)-Cholest-4-en-3-ol	Alcohol	566-90-5	68419.6	66023.2	65998.7	84833.5	87230.5	77364.8
S_TMSMW0481	442.345	C29H46O3	3251.16	2790	(3.beta.)-3-(acetyloxy)-Cholest-5-en-24-one	Ketone	20981-59-3	27119.3	26457.9	29870.9	11841.8	10814.5	9016.95
S_TMSMW0518	405.34	C29H43N	2711.09	2918	(5.alpha.)-4,4-dimethyl-N-(2-phenylethyl)-Androst-2-en-17-Amine	Amine	53286-45-6	31550	29366.3	34662.7	45531.8	46459.6	38577.2
S_TMSMW1541	140.157	C10H20	994.21	1000.0000	(E)-3-methyl-2-Nonene	Hydrocarbons	17003-99-5	27871.5	31763.1	24951.6	49045.6	46545	44053.9
S_TMSMW0564	137.084	C8H11NO	1700.37	1881	(R)-(-)-2-Phenylglycinol	Alcohol	56613-80-0	428067	444571	501829	555629	636505	581508
S_TMSMW1432	337.334	C22H43NO	2796.52	2793.0000	(Z)-13-Docosenamide 1	Amine	112-84-5	1.48681e+07	1.4821e+07	1.4727e+07	1.66726e+07	1.68814e+07	1.50906e+07
S_TMSMW0384	319.324	C22H41N	2503.2	2495	(Z)-Docos-9-enenitrile	Others	1000465-48-0	3.31955e+06	4.31877e+06	3.57017e+06	5.80504e+06	5.67661e+06	5.39468e+06
S_TMSMW0945	172.146	C10H20O2	1570.56	1535.0000	.alpha.,.alpha.,4-trimethyl-4-hydroxy-Cyclohexanemethanol	Alcohol	80-53-5	34282.5	38513.8	35861.3	54553.5	60311.8	53232.1
S_TMSMW0016	62.037	C2H6O2	981.136	990	1,2-Ethanediol	Alcohol	107-21-1	466995	626163	509754	1.08252e+06	999500	994881
S_TMSMW0025	162.141	C12H18	1050.11	1127	1,2-bis(1-methylethyl)-Benzene	Others	577-55-9	24680.4	30047	30730	66264	62487	63384
S_TMSMW1384	390.277	C24H38O4	2749.4	2696.0000	1,4-Benzenedicarboxylic acid, bis(2-ethylhexyl) ester	Ester	6422-86-2	22974.5	14607	13214.9	22208.4	22492.4	19794.9
S_TMSMW1076	278.152	C16H22O4	1967.91	1963.0000	1,4-Dibutyl benzene-1,4-dicarboxylate	Ester	1962-75-0	289336	240832	324788	428450	473514	397139
S_TMSMW0283	162.053	C6H10O5	1690.78	1691	1,6-anhydro-.beta.-D-Glucopyranose	Carbohydrate	498-07-7	225524	232958	269594	107752	125348	102777
S_TMSMW1380	198.141	C15H18	1694.63	1674.0000	1,6-dimethyl-4-(1-methylethyl)-Naphthalene	Aromatics	483-78-3	243013	232965	270898	201963	218432	191001
S_TMSMW0498	254.058	C15H10O4	2543.64	2665	1,8-dihydroxy-3-methyl-9,10-Anthracenedione	Ketone	481-74-3	23898.7	25864.9	27217.3	33456.7	31534.1	29921.4
S_TMSMW0678	176.12	C12H16O	1455.16	1440	1-(4-methylphenyl)-1-Pentanone	Ketone	1671-77-8	47547.4	54039.6	51165.7	175752	185220	177666
S_TMSMW0150	292.208	C15H34OP2	1178.53	-	1-(diisopropylphosphino)-3-(diisopropylphosphinyl)-Propane	Others	1000156-39-0	48086	51786.5	39669.5	103574	98836.7	91729.2
S_TMSMW1469	189.09	C10H11N3O	1436.49	1625.0000	1-Acetyl-3-(4-pyridyl)-pyrazoline	Heterocyclic compound	50610-11-2	58188.3	60098.2	64474.9	80213.1	94784.7	88016.8
S_TMSMW1049	168.188	C12H24	1193.26	1190.0000	1-Dodecene	Hydrocarbons	112-41-4	102974	110440	104505	169863	173512	174325
S_TMSMW0908	382.417	C26H54O	2935.81	2945.0000	1-Hexacosanol	Alcohol	506-52-5	8829.3	7408.18	8683.74	13580.7	13398.2	9895.59
S_TMSMW1315	102.104	C6H14O	987.294	932.0000	1-Hexanol	Alcohol	111-27-3	16214.2	16523.8	14879.3	51770.9	49515.1	44651.6
S_TMSMW0330	130.136	C8H18O	1098.52	1183	1-Octanol	Alcohol	111-87-5	18230	23899	17644	32233	31941	31363
S_TMSMW0012	113.084	C6H11NO	964.156	889	1-acetyl-2-methyl-Azetidine	Others	50837-77-9	3.76444e+06	4.10901e+06	3.90252e+06	6.34364e+06	5.74284e+06	6.08326e+06
S_TMSMW1383	154.172	C11H22	1299.93	1140.0000	1-ethyl-2-propyl-Cyclohexane	Hydrocarbons	62238-33-9	41391	50796	46696	68930	75307	67479
S_TMSMW0175	296.1	C12H25I	1832.57	1635	1-iodo-Dodecane	Lipid	4292-19-7	55548	46893	63904	73756	82019	75702
S_TMSMW0960	352.163	C16H33I	1819.28	2038.0000	1-iodo-Hexadecane	Others	544-77-4	37733	28877	40392	49036	53975	42562
S_TMSMW1048	464.288	C24H49I	2366.7	2942.0000	1-iodo-Tetracosane	Others	1000406-32-0	65383.4	59765.3	54018	95512	107452	90985.8
S_TMSMW0696	140.131	C8H16N2	924.968	1056	1-isobutyl-3-methyl-2-Pyrazoline	Heterocyclic compound	26964-53-4	15079.2	12123.2	15515.7	74399.7	60136.6	73532
S_TMSMW0126	85.039	CH3N5	1692.03	-	1H-Tetrazol-5-Amine	Amine	4418-61-5	182396	217299	199726	262004	323923	273616
S_TMSMW0431	106.063	C4H10O3	1334.94	1233	2,2'-oxybis-Ethanol	Alcohol	111-46-6	11994.9	10816.4	10628.4	38451.5	34580.1	32787.4
S_TMSMW1568	286.157	C18H22O3	2005.89	2134.0000	2,2-Bis(4'-methoxyphenyl)-2-ethoxyethane	Others	1000283-53-7	2371.22	1894.34	2074.34	6254.23	7406.39	6525.92
S_TMSMW0228	186.126	C10H18O3	1349.05	1150	2,2-Dimethylpropanoic anhydride	Others	1538-75-6	47754	49356.5	45136.6	70359.7	66180.8	68561
S_TMSMW1433	154.172	C11H22	1044.01	930.0000	2,3,6-trimethyl-4-Octene	Hydrocarbons	63830-65-9	16114.4	19360.9	17553.7	27982.7	23898.9	25083.4
S_TMSMW0699	184.219	C13H28	1305.87	1466	2,3,7-trimethyl-Decane	Lipid	62238-13-5	126676	146319	132651	208735	203493	198002
S_TMSMW0130	90.068	C4H10O2	1032.68	1032	2,3-Butanediol	Alcohol	513-85-9	22524.5	17962	24717.7	403303	385071	371658
S_TMSMW1422	101.048	C4H7NO2	1001.14	887.0000	2,3-Butanedione, monooxime	Ketone	57-71-6	73764.7	90673.9	80235.4	129673	103933	115402
S_TMSMW0896	118.027	C4H6O4	1440.87	1641.0000	2,3-Dihydroxybutanedial	Aldehyde	34361-91-6	11045.3	10860	11820	6950	7417	7707
S_TMSMW1284	386.609	C23H46O4	2960.18	2998.0000	2,3-Dihydroxypropyl icosanoate	Ester	30208-87-8	151006	157323	153977	349933	341367	321985
S_TMSMW0804	302.25	C17H34O4	2383.69	2338	2,3-dihydroxypropyl 12-methyltridecanoate	Lipid	10828227	78063	94131	66388	90274	86164	84062
S_TMSMW0718	206.167	C14H22O	1511.75	1519	2,4-Di-tert-butylPhenol 1	Phenol	96-76-4	883476	831336	924577	839106	927299	915344
S_TMSMW0176	206.167	C14H22O	1535.4	1549	2,4-Di-tert-butylPhenol 2	Phenol	96-76-4	4.02584e+06	4.56392e+06	4.60496e+06	6.57717e+06	7.11589e+06	6.78819e+06
S_TMSMW0975	184.219	C13H28	1216.74	1208.0000	2,4-dimethyl-Undecane	Lipid	17312-80-0	20566	25221	21345	35690	33880	33363
S_TMSMW1496	164.084	C10H12O2	1360.61	1398.0000	2,5-Dimethyl-para-anisaldehyde	Aldehyde	6745-75-1	74928.7	88185.8	87513	123425	125920	115981
S_TMSMW0669	156.188	C11H24	1013.66	1021	2,5-dimethyl-Nonane	Lipid	17302-27-1	245019	272848	264847	449849	394956	379142
S_TMSMW0727	226.266	C16H34	1459.1	1449	2,6,10-Trimethyltridecane	Lipid	3891-99-4	514707	528706	510659	678656	773012	619324
S_TMSMW0957	254.297	C18H38	1645.12	1633.0000	2,6,10-trimethyl-Pentadecane	Lipid	3892-00-0	198604	210652	244527	298024	329337	293743
S_TMSMW1094	212.25	C15H32	1399.57	1275.0000	2,6,11-trimethyl-Dodecane	Lipid	31295-56-4	307003	270896	217302	329957	359577	292774
S_TMSMW0504	156.188	C11H24	1048.09	966	2,6,6-trimethyl-Octane	Lipid	54166-32-4	33889.9	38464.7	34840.4	61761.8	55330.8	59604.2
S_TMSMW0197	168.042	C8H8O4	1761.65	1656	2,6-dihydroxy-Benzoic acid, methyl Ester	Ester	2150-45-0	4520.43	3510.74	4615	5250.76	6810	5412.42
S_TMSMW0844	184.219	C13H28	1212.36	1210	2,6-dimethyl-Undecane	Lipid	17301-23-4	327949	377594	343513	554160	543483	468287
S_TMSMW0277	212.25	C15H32	1281.62	1320	2,7,10-trimethyl-Dodecane	Lipid	74645-98-0	103224	119822	110494	162809	172031	164542
S_TMSMW1349	184.219	C13H28	1287.43	1165.0000	2,8,8-trimethyl-Decane	Hydrocarbons	1000060-81-2	42108	47360	43346	65378	74090	62142
S_TMSMW0822	159.126	C8H17NO2	1169.96	1322	2-(2-Isopropyloxazolidin-3-yl)ethan-1-ol	Heterocyclic compound	28770-01-6	650890	699254	648636	1.47717e+06	1.4138e+06	1.3399e+06
S_TMSMW0875	134.094	C6H14O3	1321.39	1159.0000	2-(2-ethoxyethoxy)-Ethanol	Alcohol	111-90-0	249767	267582	246599	341746	354783	296130
S_TMSMW0189	270.162	C18H22O2	1858.97	2072	2-(4'-Methoxyphenyl)-2-(3'-methyl-4'methoxyphenyl)propane	Others	1000283-53-6	29784.7	24942	31598.9	80118	94994.3	81835.6
S_TMSMW0531	131.095	C6H13NO2	1449.32	1316	2-(Ethylamino)ethanol, N-acetyl	Alcohol	1000385-96-0	23943.8	26020.6	24243.2	36228.8	38535.6	36962.2
S_TMSMW0909	198.104	C14H14O	1754.76	1791.0000	2-Benzyl-4-Methylphenol	Phenol	52857-30-4	278521	261458	314427	894036	1.01845e+06	873449
S_TMSMW1555	172.146	C10H20O2	972.587	1171.0000	2-Ethylhexanal ethylene glycol acetal	Aldehyde	1000431-01-2	113299	123104	119336	167514	163881	159290
S_TMSMW1478	224.134	C10H22FO2P	2366.88	-	2-Ethylhexyl ethylphosphonofluoridate	Others	1000298-44-7	20878	24185.3	22058	33873	37936.2	31500
S_TMSMW0557	574.126	C18H24F10O9	1586.11	1941	2-[2-[2-[2-[2-[2-(2,2,3,3,3-Pentafluoropropanoyl)oxyethoxy]ethoxy]ethoxy]ethoxy]ethoxy]ethyl 2,2,3,3,3-pentafluoropropanoate	Ester	1000351-99-6	23709.1	24029.1	30622.1	32972.9	39575.3	35732.2
S_TMSMW0354	134.094	C6H14O3	1377.62	1384	2-ethyl-2-(hydroxymethyl)-1,3-Propanediol	Alcohol	77-99-6	67215.5	79768.9	74226.2	157490	162079	159124
S_TMSMW1011	242.261	C16H34O	2082.88	1770.0000	2-ethyl-2-methyl-Tridecanol	Alcohol	1010115-66-1	111967	88566	129980	156970	150426	140747
S_TMSMW0443	170.203	C12H26	1164.45	1164	2-methyl-Undecane	Lipid	7045-71-8	112471	126399	118889	195994	179837	194295
S_TMSMW0922	150.068	C9H10O2	1496.03	1493.0000	3,4-dimethyl-Benzoic acid 1	Acid	619-04-5	52847.9	65235.2	59347.2	94642	86085.6	81575.3
S_TMSMW0983	184.219	C13H28	1251.9	1210.0000	3,6-dimethyl-Undecane	Lipid	17301-28-9	303582	360634	324419	492130	502403	536404
S_TMSMW1103	184.219	C13H28	1239.42	1222.0000	3,7-dimethyl-Undecane	Lipid	17301-29-0	159597	182829	171171	264198	263907	255093
S_TMSMW0163	184.219	C13H28	1294.66	1185	3,8-dimethyl-Undecane	Lipid	17301-30-3	87819	97498	88080	140780	132968	139258
S_TMSMW1472	310.36	C22H46	1899.57	2158.0000	3-Ethyl-3-methylnonadecane	Hydrocarbons	1000360-42-6	88420	73696	93604	117551	134784	106649
S_TMSMW1574	371.28	C22H36F3N	2005.97	2182.0000	3-Trifluoromethylbenzylamine, N,N-diheptyl	Amine	1000310-29-4	2154.3	1936.38	1919.56	6254.23	7146.46	6114.74
S_TMSMW0759	248.174	C10H28N2OSi2	1836.64	2210	3-[3-(3-Aminopropyl)-1,1,3,3-tetramethyldisiloxanyl]propylAmine	Amine	2469-55-8	3957.36	3648.47	4159.32	24459.5	26947.5	23256.4
S_TMSMW0028	110.013	C3H7ClO2	1180.3	1049	3-chloro-1,2-Propanediol	Alcohol	96-24-2	226976	251339	214290	414310	380322	356369
S_TMSMW1071	212.25	C15H32	1556.97	1464.0000	3-ethyl-Tridecane	Lipid	13286-73-2	9814	12941	11569	16113	18522	15158
S_TMSMW0049	138.032	C7H6O3	1625.66	1574	3-hydroxy-Benzoic Acid	Acid	99-06-9	11139.5	10816.4	12349.9	15928.9	18821.4	15045.7
S_TMSMW0971	140.157	C10H20	959.134	918.0000	3-methyl-6-methylene-Octane	Lipid	74630-07-2	2186	1722	666	3932	2801	2156
S_TMSMW0540	184.219	C13H28	1363.67	1271	3-methyl-Dodecane	Lipid	17312-57-1	108223	126580	120767	174959	184309	166748
S_TMSMW0856	212.25	C15H32	1563.14	1470	3-methyl-Tetradecane	Lipid	18435-22-8	101691	107327	99792.2	142881	159556	133762
S_TMSMW0530	198.235	C14H30	1273.1	1325	4,6-dimethyl-Dodecane	Lipid	61141-72-8	751305	850527	782305	1.20587e+06	1.21973e+06	1.12849e+06
S_TMSMW0664	184.219	C13H28	1433.75	1196	4,6-dimethyl-Undecane	Lipid	17312-82-2	111592	133114	119522	169956	187790	160377
S_TMSMW0162	184.219	C13H28	1104.73	1185	4,7-dimethyl-Undecane	Lipid	17301-32-5	89911.6	82077.2	88492.2	145078	141115	138931
S_TMSMW1263	145.064	C8H7N3	1741.71	1952.0000	4-(1H-Imidazol-4-yl)pyridine	Heterocyclic compound	51746-87-3	22593.1	28003.8	26508	4689.68	4025.33	4082.7
S_TMSMW0735	300.083	C12H11F3N4O2	1907.24	1859	4-(2,2,2-trifluoroethoxy)-6-methoxy-N-phenyl-1,3,5-Triazin-2-Amine	Amine	1000277-96-0	7149.56	6371.17	7512.21	22090.3	27483.3	20793.6
S_TMSMW0790	426.17	C17H30O12	2708.03	2853	4-(2-Methylbutanoyl)Sucrose	Carbohydrate	122706131	1.37528e+07	1.39759e+07	1.40187e+07	7.04518e+06	7.01585e+06	7.09438e+06
S_TMSMW1298	164.02	C5H3F3N2O	1038.4	913.0000	4-Hydroxy-6-(trifluoromethyl)pyrimidine	Heterocyclic compound	1546-78-7	106419	120802	111635	180555	170510	174482
S_TMSMW1525	194.094	C11H14O3	1778.22	1521.0000	4-Methoxyphenylaldehyde trimethylene acetal	Aldehyde	1010429-63-9	9545.13	8245.15	9642.89	13275.5	16055.9	14258.6
S_TMSMW0011	115.038	C3H5N3O2	1013.12	1039	4-Methylurazole	Others	16312-79-1	126286	154405	130342	230232	215250	192490
S_TMSMW0415	95.037	C5H5NO	1036.96	1150	4-Pyridinol	Heterocyclic compound	626-64-2	76149.4	109164	81556.4	184448	174352	175513
S_TMSMW0621	203.131	C13H17NO	1460.05	1771	4-ethyl-N-methallyl-Benzamide	Others	1000340-34-6	34576	37320.9	36122.1	49930.8	56253.1	46833.5
S_TMSMW1104	184.219	C13H28	1261.06	1242.0000	4-ethyl-Undecane	Lipid	17312-59-3	406895	432294	413760	652070	646795	627098
S_TMSMW1243	124.052	C7H8O2	2101.36	1803.0000	4-hydroxy-Benzenemethanol 2	Alcohol	623-05-2	62918	50369.5	59638.3	172941	167014	155286
S_TMSMW1075	168.188	C12H24	1300.12	1085.0000	4-methyl-1-Undecene	Hydrocarbons	74630-39-0	104254	118440	106686	173543	168833	167108
S_TMSMW0018	156.188	C11H24	1022.76	1060	4-methyl-Decane	Lipid	2847-72-5	321255	362397	339837	554872	516659	559361
S_TMSMW0709	212.25	C15H32	1420.02	1459	4-methyl-Tetradecane	Others	25117-24-2	91033.9	100209	82737.1	133688	145398	138125
S_TMSMW0297	184.219	C13H28	1443.29	1229	5,5-dimethyl-Undecane	Lipid	17312-73-1	27427.3	28886.6	25644.5	51661	48860.6	49300
S_TMSMW0685	157.067	C6H11N3S	1560.32	1442	5-(1,1-dimethylethyl)-1,2-dihydro-3H-1,2,4-Triazole-3-thione	Heterocyclic compound	38449-51-3	11810.3	11442.1	9785.83	8398.9	8346.11	7663.81
S_TMSMW1333	184.219	C13H28	1092.96	1185.0000	5-(2-methylpropyl)-Nonane	Hydrocarbons	62185-53-9	31215.6	34476.1	30138.9	49059	43957.3	38015.5
S_TMSMW0022	156.188	C11H24	1099.01	986	5-ethyl-2-methyl-Octane	Lipid	62016-18-6	279232	306288	287969	469687	453227	414449
S_TMSMW0141	184.219	C13H28	1209.22	1255	5-methyl-Dodecane	Lipid	17453-93-9	112502	129032	116635	187379	185889	199114
S_TMSMW0179	85.039	CH3N5	1672.99	-	5H-Tetrazol-5-amine	Others	1000273-02-0	24120	19481	27244	26715	37403	27508
S_TMSMW0589	369.194	C22H27NO4	2637.49	2923	6-(4-ethoxyphenyl)-3-methyl-4-oxo-4,5,6,7-tetrahydro-1H-Indole-2-carboxylic acid, isobutyl ester	Heterocyclic compound	1000316-17-3	28234	24637.6	24580.2	46869.3	44517.3	41219.6
S_TMSMW0419	156.188	C11H24	1112.68	986	6-ethyl-2-methyl-Octane	Lipid	62016-19-7	70043	69650.7	58148.9	97318.2	91200.1	85290
S_TMSMW1105	184.219	C13H28	1230.33	1230.0000	6-ethyl-Undecane	Lipid	17312-60-6	19744.9	23786.1	21256.2	34160.6	34037.3	32941.3
S_TMSMW0336	203.131	C13H17NO	1449.47	1708	7-methoxy-2,2,4-trimethyl-1,2-dihydro-Quinoline	Heterocyclic compound	1000316-56-5	23986.8	26778.1	24392.5	36004.9	38547.8	36993.9
S_TMSMW0115	59.037	C2H5NO	922.154	828	Acetamide 1	Amine	60-35-5	2.44561e+07	2.58314e+07	2.50428e+07	2.76491e+07	2.69731e+07	2.50159e+07
S_TMSMW0994	59.037	C2H5NO	968.777	907.0000	Acetamide 2	Amine	60-35-5	407717	476819	422525	661212	694058	641040
S_TMSMW0912	89.048	C3H7NO2	1079.6	1100.0000	Alanine	Amino acid	56-41-7	728527	787682	748904	1.15634e+06	1.11508e+06	1.18407e+06
S_TMSMW1114	240.042	C14H8O4	2506.8	2552.0000	Alizarin	Aromatics	72-48-0	62887.6	52748.2	61808.2	78979.6	68652.6	63543
S_TMSMW0931	122.037	C7H6O2	1251.4	1487.0000	Benzoic Acid 2	Acid	65-85-0	19940.4	15518.3	15494.2	29073.4	26404	25009.3
S_TMSMW1013	220.183	C15H24O	1511.42	1513.0000	Butylated Hydroxytoluene	Aromatics	128-37-0	19070.6	24497.9	23729.1	17040.2	20322.5	18196.3
S_TMSMW1532	430.264	C26H39O3P	2360.07	-	Butylphosphonic acid, heptyl 4-(2-phenylprop-2-yl)phenyl ester	Ester	1000323-09-7	4596.31	4768.03	6738.96	10470.3	8979.94	8381.48
S_TMSMW1352	202.172	C15H22	1595.6	1528.0000	Cadina-1(10),6,8-triene	Aromatics	1460-96-4	358971	373441	380928	1.06311e+06	1.17466e+06	932676
S_TMSMW1299	290.079	C15H14O6	2835.37	2871.0000	Catechin	Heterocyclic compound	154-23-4	29624.3	44814.8	72722.8	1756.54	1638.32	1821.13
S_TMSMW1043	224.25	C16H32	1593.13	1592.0000	Cetene	Hydrocarbons	629-73-2	57193.3	59203	61839.3	97310.7	101606	91051.3
S_TMSMW0516	259.058	C16H15Cr	1028.52	-	Chromium, (.eta.-5-cyclopentadienyl)-(.eta.-6-1-methylnaphthalene)	Others	1000158-74-0	38155.6	40880.4	40789	64743.3	57737.4	51854.7
S_TMSMW0798	132.01	C4H4O5	1341.94	1310	Cis-Epoxysuccinic Acid	Organic acid	16533-72-5	21847.7	24719	26841.6	23906.7	21351.9	22124.6
S_TMSMW0203	180.063	C6H12O6	1872.32	1879	D(+)-Talose 1	Carbohydrate	2595-98-4	1.42016e+06	1.21753e+06	1.77024e+06	599912	728190	585927
S_TMSMW0204	180.063	C6H12O6	1892.28	1886	D-Allose 2	Carbohydrate	2595-97-3	309049	257890	391265	116727	139389	114022
S_TMSMW1291	150.13	C5H10O5	1663.55	1637.0000	D-Arabinopyranose	Carbohydrate	28697-53-2	32036	29542	34926	7500.95	7704.15	7071.87
S_TMSMW0555	180.063	C6H12O6	1612.75	1889	D-Galactose 2	Carbohydrate	59-23-4	99276.1	97835.6	102523	17704.6	20740.7	17088.6
S_TMSMW0916	180.063	C6H12O6	1866.33	1939.0000	D-Galactose 3	Carbohydrate	59-23-4	210238	206290	229905	12946.6	13395.3	12765.4
S_TMSMW0493	182.079	C6H14O6	1902.37	1964	D-Mannitol 2	Carbohydrate	69-65-8	1.21398e+06	1.07704e+06	1.36617e+06	627209	734225	621081
S_TMSMW0666	142.172	C10H22	1001.65	1000	Decane	Lipid	124-18-5	73918	90673.9	80235	129673	114683	115402
S_TMSMW1177	168.058	C12H8O	1461.68	1515.0000	Dibenzofuran	Heterocyclic compound	132-64-9	17754.9	20474.9	19820.3	22827.9	25902.1	22003.4
S_TMSMW0030	170.203	C12H26	1200.28	1200	Dodecane	Lipid	112-40-3	520911	579882	480462	726359	710386	687074
S_TMSMW0369	200.178	C12H24O2	1649.57	1655	Dodecanoic Acid	Acid	143-07-7	46082.6	32894.6	32746.7	61152.1	68194.1	62537
S_TMSMW1570	238.23	C16H30O	2164.08	1808.0000	E-14-Hexadecenal	Aldehyde	330207-53-9	98560.5	76178.3	61165.2	103590	112405	1.00434e+06
S_TMSMW0878	338.318	C22H42O2	2612.85	2609.0000	Erucic Acid 1	Acid	112-86-7	18229	23825	20797	52104.3	52435.8	49834.5
S_TMSMW0237	208.095	C8H16O6	2250.91	2027	Ethyl .alpha.-d-glucopyranoside	Carbohydrate	19467-01-7	37184.5	38088.1	36736.2	3806.01	3738.92	3618.62
S_TMSMW0869	106.078	C8H10	956.699	1115.0000	Ethylbenzene 2	Aromatics	100-41-4	594831	665691	523932	952066	869333	887499
S_TMSMW0785	180.063	C6H12O6	1856.43	1869	Fructose 1	Carbohydrate	57-48-7	533856	498414	626525	655877	644080	557592
S_TMSMW0201	180.063	C6H12O6	1846.8	1875	Fructose 2	Carbohydrate	57-48-7	810001	755834	943682	89449	89291.1	86761.8
S_TMSMW1500	348.991	C16H9Cl2NO4	2518.92	2599.0000	Furan-2-carboxylic acid, 4-(3,5-dichloropyridin-2-yloxy)phenyl ester	Lipid	1000304-12-1	18275.5	21358.5	16923.6	30333.2	30406.5	27715
S_TMSMW0161	92.047	C3H8O3	1260.42	1289	Glycerin	Alcohol	56-81-5	1.86544e+06	2.14449e+06	1.98681e+06	2.94711e+06	2.92594e+06	2.92487e+06
S_TMSMW0225	330.277	C19H38O4	2575.99	2607	Glycerol 1-palmitate	Ester	542-44-9	1.09419e+07	1.21398e+07	1.01977e+07	1.2794e+07	1.26229e+07	1.16652e+07
S_TMSMW0583	75.032	C2H5NO2	1419.22	1314	Glycine	Amino acid	56-40-6	7247.79	6733.98	6674.27	11037.6	13044	11377.1
S_TMSMW1249	75.032	C2H5NO2	1187.16	1190.0000	Glycolamide	Amine	598-42-5	138672	142319	126112	225059	215607	206504
S_TMSMW0736	296.344	C21H44	1906.01	2100	Heneicosane	Lipid	629-94-7	227623	192361	240474	281433	331749	301273
S_TMSMW0350	240.282	C17H36	1699.5	1700	Heptadecane	Lipid	629-78-7	271882	286108	342672	676007	777907	691069
S_TMSMW0075	270.256	C17H34O2	2141.13	2146	Heptadecanoic Acid	Acid	506-12-7	20409.8	14962.5	16183	21344.9	23461.1	21398.1
S_TMSMW0365	226.266	C16H34	1599.5	1600	Hexadecane	Lipid	544-76-3	221017	193283	214857	350137	377458	350952
S_TMSMW0495	330.277	C19H38O4	2541.56	2558	Hexadecanoic acid, 2-hydroxy-1-(hydroxymethyl)ethyl Ester	Ester	23470-00-0	175759	159529	217915	323202	328083	337929
S_TMSMW1051	270.256	C17H34O2	1928.21	1926.0000	Hexadecanoic acid, methyl ester	Lipid	112-39-0	44031.8	41894.5	53595.9	47552.5	49871.5	48619.1
S_TMSMW0144	76.027	CH4N2O2	1135.47	1265	Hydroxyurea	Nitrogen compounds	127-07-1	9.0695e+06	9.61942e+06	9.40434e+06	1.21452e+07	1.17949e+07	1.04706e+07
S_TMSMW1537	174.126	C9H18O3	1236.87	1117.0000	Methyl (2R,3R,4S)-2,4-dimethyl-3-hydroxyhexanoate 1	Ester	1010429-62-8	31743.6	37671	33160.8	50146.4	52315.6	47331.4
S_TMSMW0185	164.07	C6H12O5	1672.19	1583	Methyl pentopyranoside	Carbohydrate	99057	34953.6	31154.4	35483	3425.06	3037.34	2821.26
S_TMSMW1101	298.287	C19H38O2	2129.97	2128.0000	Methyl stearate	Ester	112-61-8	13270	14035.7	13723.3	17411.4	16856.1	16099.1
S_TMSMW0902	180.063	C6H12O6	1929.45	2194.0000	Muco-Inositol	Alcohol	488-55-1	18317.8	15859	19490.5	1907.05	1954.94	1560.46
S_TMSMW0215	180.063	C6H12O6	2066.53	2194	Myo-Inositol 3	Alcohol	87-89-8	132341	125487	151494	9709.57	10571.6	10180.3
S_TMSMW1527	126.116	C7H14N2	1308.37	-	N,N'-methanetetraylbis-2-Propanamine	Amine	693-13-0	16555	17647	17014	26627	32672	28705
S_TMSMW0668	89.05	C3H7NO2	1017.59	958	N,N-dimethyl-Carbamic Acid	Acid	7260-94-8	933728	994330	978978	1.62072e+06	1.54265e+06	1.53556e+06
S_TMSMW0680	103.063	C4H9NO2	1345.24	1317	N-(2-hydroxyethyl)-Acetamide	Amine	142-26-7	17075.6	17706.9	17969.7	28765.3	31168.9	28046.7
S_TMSMW1544	371.244	C21H32F3NO	2205.68	1910.0000	N-trifluoroacetyl-2,4,6-Tri-tert-butyl-N-methylaniline	Amine	1010467-22-0	3.39881e+06	2.88706e+06	3.62836e+06	5.3841e+06	5.65556e+06	5.12712e+06
S_TMSMW0167	158.131	C9H18O2	1357.67	1355	Nonanoic Acid	Acid	112-05-0	60152	49232.2	46145	61067.7	69489	60073.8
S_TMSMW0715	254.297	C18H38	1949.19	1800	Octadecane	Lipid	593-45-3	165865	139721	167752	222696	266951	240527
S_TMSMW0219	284.272	C18H36O2	2240.45	2246	Octadecanoic Acid	Acid	57-11-4	4.26142e+06	3.88577e+06	4.43713e+06	6.37489e+06	6.56956e+06	6.29347e+06
S_TMSMW0234	358.308	C21H42O4	2768.35	2806	Octadecanoic acid, 2,3-dihydroxypropyl Ester	Ester	123-94-4	7.50534e+06	8.83514e+06	7.07691e+06	1.03003e+07	9.96491e+06	9.38383e+06
S_TMSMW1560	228.173	C13H24O3	1745.68	1612.0000	Octanoic acid, 2-tetrahydrofurylmethyl ester	Lipid	33601-75-1	51772.4	53221.8	57480.5	65998.6	79409.3	74693.6
S_TMSMW0291	89.995	C2H2O4	1155.94	1136	Oxalic Acid	Acid	144-62-7	143559	155887	157079	232254	218549	196122
S_TMSMW0595	242.225	C15H30O2	1943.69	2185	Pentadecanoic Acid 2	Acid	1002-84-2	34343.7	35148.9	42069.3	15838.4	20150.2	17066.3
S_TMSMW1312	136.074	C5H12O4	1482.78	1513.0000	Pentaerythritol	Alcohol	115-77-5	523929	565762	554275	761740	857397	783603
S_TMSMW0499	312.3	C20H40O2	2437.17	2342	Phytanic Acid	Acid	14721-66-5	22524	20537	21516	29431	30726	25684
S_TMSMW1558	112.1	C6H12N2	1076.95	1022.0000	Propanal, 2-propenylhydrazone	Nitrogen compounds	19031-78-8	52766.3	58025.2	52300.7	80920.7	79114.7	78550.1
S_TMSMW0151	104.011	C3H4O4	1198.49	1216	Propanedioic Acid 2	Acid	141-82-2	4.68465e+06	6.68183e+06	4.5866e+06	7.79807e+06	7.58211e+06	7.00682e+06
S_TMSMW0334	59.073	C3H9N	1129.29	1055	PropylAmine	Amine	107-10-8	1408161	1562078	1511741	2343078	2248379	2132534
S_TMSMW0124	76.052	C3H8O2	1023.1	1007	Propylene Glycol	Alcohol	57-55-6	375561	425267	368784	950304	903471	906699
S_TMSMW0378	180.063	C6H12O6	2001.12	2194	Scyllo-Inositol	Alcohol	488-59-5	10161.8	9704	12156	1864.08	1594	1349.43
S_TMSMW0490	412.371	C29H48O	3275.67	3274	Stigmasterol 2	Alcohol	83-48-7	55580	59837.8	58568.7	32675.4	33385.8	32986
S_TMSMW0230	342.116	C12H22O11	2599.61	2712	Sucrose	Carbohydrate	57-50-1	4.34922e+06	4.751e+06	4.59631e+06	249500	245953	237552
S_TMSMW0136	278.192	C14H30O3S	1762.39	1972	Sulfurous acid, 2-ethylhexyl hexyl ester	Lipid	1000309-20-2	60581	52852.5	65264.2	82561.5	78942.3	79341.6
S_TMSMW0199	228.209	C14H28O2	1845.87	1850	Tetradecanoic Acid	Acid	544-63-8	126100	111843	147462	78643	87004.6	77025.2
S_TMSMW0816	101.023	C2H3N3O2	950.238	1072	Urazole	Heterocyclic compound	3232-84-6	3.50666e+06	3.93088e+06	3.69806e+06	6.00924e+06	5.4832e+06	5.81098e+06
S_TMSMW0747	415.256	C25H39NP2	2713.98	2851	[2-(6-methyl-2-pyridyl)ethyl](phenyl)-[3-(di-t-butylphosphino)propyl]-Phosphine	Heterocyclic compound	1000163-56-9	162858	151525	169873	231921	238908	216504
S_TMSMW0829	355.158	C20H28CoN2	2347.99	-	bis(.eta.-5-piperidinylcyclopentadienyl)-Cobalt	Heterocyclic compound	1000162-04-6	2563.72	3705.07	4110.97	2765.82	3208.09	2421.84
S_TMSMW0261	61.02	CH3NO2	1060.98	1140	carbamic Acid 2	Acid	463-77-4	3.26547e+06	3.62082e+06	3.45905e+06	5.48284e+06	5.36888e+06	4.70539e+06
S_TMSMW1027	202.172	C15H22	1538.2	1531.0000	cis-Calamenene	Terpenes	72937-55-4	139261	151194	149427	648076	716257	698409
S_TMSMW1320	150.053	C5H10O5	1641.56	1953.0000	d-Arabinose 3	Carbohydrate	10323-20-3	384971	376490	391762	58147.5	66682.6	55571.3
S_TMSMW0264	117.08	C5H11NO2	1054.26	943	diethylcarbamic Acid	Acid	24579-70-2	5.56644e+06	6.39539e+06	5.94433e+06	8.85553e+06	8.64012e+06	8.28435e+06
S_TMSMW0602	170.058	C8H10O4	1607.64	1852	dl-3,4-Dihydroxyphenylglycol	Alcohol	28822-73-3	142536	123441	118369	115925	142961	164064
S_TMSMW0023	76.016	C2H4O3	1070.74	1081	hydroxy-Acetic Acid	Acid	79-14-1	129784	141826	132302	214351	214390	191172
S_TMSMW1581	387.298	C21H41NO5	2137.21	2654.0000	l-Norvaline, N-(2-methoxyethoxycarbonyl)-, dodecyl ester	Amino acid	1000328-64-4	29285.1	38236.5	29280.7	33519	26343.6	28208.4
S_TMSMW0628	292.204	C18H28O3	1939.06	1943	methyl 3-(3,5-ditert-butyl-4-hydroxyphenyl)propanoate	Lipid	6386-38-5	16019.8	13885.5	18578.1	11136.5	12943	15126.4
S_TMSMW0196	178.084	C7H14O5	1800.92	1644	methyl 6-deoxy-.alpha.-L-Galactopyranoside	Carbohydrate	14687-15-1	27070.1	12294.8	32852.1	2008.9	2402.29	1779.82
S_TMSMW0211	256.24	C16H32O2	2042.53	2050	n-Hexadecanoic Acid	Acid	57-10-3	7.05827e+06	6.10347e+06	7.5423e+06	9.46907e+06	1.00725e+07	9.39298e+06
S_TMSMW1427	360.136	C23H20O4	3263.21	2913.0000	o-(4-ethylbenzoyl)-o'-(3-methylbenzoyl)-1,3-Benzenediol	Alcohol	1000330-83-6	68436.9	78821.3	64276.2	129462	105424	117701
S_TMSMW0517	282.256	C18H34O2	2214.08	2475	trans-13-Octadecenoic Acid	Acid	693-71-0	25308.2	26462.6	30452.2	14421.6	15258.1	13144.5
